# Supplementary material for: A Weighted Gene Co-expression Network Analysis Reveals lncRNA Abnormalities in the Peripheral Blood Associated With Ultra-High-Risk for Psychosis
Source: Front Psychiatry. 2020 Dec 15;11:580307. doi: 10.3389/fpsyt.2020.580307 (PMC7769947; doi:10.3389/fpsyt.2020.580307)
Supplement: Supplementary file 1 [file Table_1.XLSX]

## Sheet: Sheet 1
	Supplementary Tables 1: module eigengene (ME) in different LncRNA modules
group	MEblue	MEbrown	MEturquoise	MEyellow	MEgreen	MEpink	MEpurple	MEgreenyellow	MEred	MEblack	MEmagenta	MEgrey
TDC1	-0.229834	-0.237068	-0.101653	-0.00527988	0.253109	0.12493	-0.0295353	0.0806657	0.0945835	-0.0124115	-0.0893971	-0.14958
TDC2	-0.141152	-0.177645	-0.114673	-0.0299416	0.224741	0.0732731	0.00883897	0.0781845	0.0994957	0.00504798	-0.0692287	-0.0966395
TDC3	-0.256834	-0.266499	-0.1237	-0.00740117	0.209787	0.0325098	0.0815783	-0.0714584	0.0806778	0.0730577	0.0743656	-0.260508
TDC4	-0.385106	-0.34002	-0.0929362	0.0410796	0.234524	0.0569254	-0.0248608	0.0360908	0.0759829	-0.0254444	-0.0963248	0.228375
TDC5	-0.178092	-0.192321	-0.105583	0.00793603	0.227252	0.0875331	0.0358718	0.0101298	0.0752619	0.0407755	-0.00890884	-0.201846
TDC6	-0.246709	-0.23975	-0.129235	-0.0159168	0.232859	0.0565754	0.109386	-0.0526847	0.0798916	0.0710439	0.0793175	-0.265776
TDC7	-0.225917	-0.19471	-0.0764076	0.0212953	0.239467	0.161318	-0.0548852	-0.0119609	0.0913121	-0.0177674	-0.0954497	-0.182566
TDC8	-0.195502	-0.216331	-0.10065	0.0157231	0.224722	0.0580693	0.0365633	-0.0253865	0.0894691	-0.0485134	-0.065991	-0.16943
TDC9	-0.151005	-0.148679	-0.155001	-0.335011	-0.0248214	0.0783471	0.21036	-0.116389	0.0974915	0.24685	0.25341	-0.156623
TDC10	-0.0873509	-0.109375	-0.151999	-0.284533	-0.0342911	-0.039475	0.199854	-0.0647991	0.0880407	0.21314	0.229355	-0.159585
TDC11	-0.0720571	-0.109495	-0.151491	-0.305121	-0.0371742	-0.0293898	0.177398	-0.0658924	0.0931528	0.215444	0.220356	-0.179655
TDC12	-0.0692146	-0.0943103	-0.142506	-0.286155	-0.0489349	0.00844071	0.191159	-0.129196	0.095552	0.244744	0.243664	-0.0567094
TDC13	0.0228157	-0.0288233	-0.0863655	-0.181153	0.0877592	0.270722	0.181878	0.297675	0.0780454	0.112447	0.205226	-0.143628
TDC14	0.0269211	-0.0156424	-0.0878845	-0.187894	-0.0736198	0.131961	0.194935	0.371749	0.0833164	0.140116	0.223853	-0.15989
TDC15	0.0660226	0.0249059	-0.0693301	-0.172683	-0.100111	0.0934864	0.200937	0.306387	0.0558716	0.12873	0.228861	-0.108488
TDC16	0.0176626	-0.0306456	-0.0864456	-0.178786	0.0920412	0.274095	0.179653	0.298833	0.0789551	0.111721	0.202777	-0.145736
TDC17	0.0293667	-0.0133601	-0.0889878	-0.18734	-0.0713228	0.133702	0.18981	0.371501	0.0848787	0.138807	0.221578	-0.15142
TDC18	0.0865116	0.0346956	-0.0601262	-0.176992	0.0108109	0.247172	0.152509	0.35807	0.0739382	0.0877339	0.161017	-0.0904826
UHR1	-0.0100104	0.128024	0.26383	0.147106	0.0270237	0.0229145	0.0637572	-0.140793	-0.386608	-0.236522	-0.113577	0.154532
UHR2	0.00516173	0.159873	0.291617	0.217311	0.0542293	0.0817472	0.00817191	-0.124381	-0.18709	-0.335062	-0.183046	0.103624
UHR3	0.0729516	0.293788	0.375705	0.246018	0.0216059	0.0105623	-0.0274238	-0.139923	-0.355362	-0.302413	-0.208405	0.127256
UHR4	0.105779	0.337752	0.389001	0.276341	-0.169142	-0.124064	-0.0572222	-0.147759	-0.427451	-0.277775	-0.166491	0.0919735
UHR5	-0.0364038	0.15618	0.294383	0.204563	0.0605864	0.0649567	-0.0148312	-0.133278	-0.170659	-0.311318	-0.165338	0.0912671
UHR6	0.0219206	0.190027	0.288626	0.168665	0.0890603	0.0508095	0.00311426	-0.145416	-0.378413	-0.248522	-0.143404	0.159619
UHR7	0.194066	0.0731709	-0.0740118	0.0682214	-0.285541	-0.235392	-0.180625	-0.224906	0.100883	0.193139	0.127694	0.203572
UHR8	0.26489	0.128262	-0.0329386	0.130049	-0.196283	-0.294048	-0.335767	-0.0203717	0.109028	-0.0494442	-0.237443	0.222725
UHR9	0.199582	0.0745128	-0.0666092	0.0452831	-0.134256	-0.0838289	-0.189539	-0.195294	0.0895489	0.184039	0.113645	0.249405
UHR10	0.223963	0.0880742	-0.074567	0.0735749	-0.206821	-0.154488	-0.214483	-0.184375	0.110234	0.111421	-0.0148053	0.21767
UHR11	0.275692	0.127101	-0.0422819	0.139567	-0.271598	-0.348446	-0.34684	-0.0118497	0.113116	-0.0347539	-0.225927	0.194256
UHR12	0.30662	0.15949	-0.0297664	0.148511	-0.409402	-0.482092	-0.362111	-0.0282587	0.11247	-0.0553365	-0.23996	0.242155
UHR13	0.290953	0.143149	-0.0346466	0.15669	-0.251215	-0.340658	-0.362221	-0.0268943	0.108202	-0.0553878	-0.249653	0.273764
UHR14	0.0743065	0.29567	0.376634	0.246274	0.0249548	0.0118305	-0.0254298	-0.148019	-0.353817	-0.307585	-0.211769	0.118371
